# Supplementary material for: Identification and characterization of putative Aeromonas spp. T3SS effectors
Source: PLOS journal article supplement (doi:10.1371/journal.pone.0214035), 2019-06-04
Supplement: S4 (10.1371/journal.pone.0214035.s004) [file journal.pone.0214035.s004]

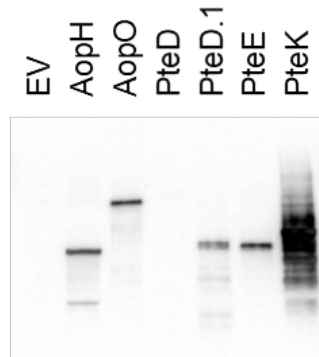

**S4 Figure. Western blot analysis of *S. cerevisiae* BY4741 lysates expressing the 7-HA epitope-tagged putative T3SS effectors *aopH*, *aopO*, *pteD*, *pteD.1* *pteE* and *pteK*.** The molecular weights of the of the major bands corresponded to those of the indicated effectors as determined by comparison with Kaleidoscope prestained standard (BioRad).
